# Supplementary material for: In vitro nanoparticle dosimetry for adherent growing cell monolayers covering bottom and lateral walls
Source: Part Fibre Toxicol. 2018 Oct 30;15:42. doi: 10.1186/s12989-018-0278-9 (PMC6208118; doi:10.1186/s12989-018-0278-9)
Supplement: Supplementary file 3 — Plot_dose_results. (M 2 kb) [file 12989_2018_278_MOESM3_ESM.m]

%% ===== subfunction plot_dose_results =====
% The subfunction plot_dose_results generates a plot of the dose over time
% and calculates a 3D particle distribution throughout the well. 
%
% syntax: plot_dose_results(out,uip,p)
% 
% input: structures called out (contains the output of the main function), uip
%        (contains all user input) and p (contains particle parameters)
%
% output: opens figure windows with the corresponding plots
%
% Author:       Laura K�nig
% Email:        laura.koenig@st.ovgu.de
% Group:        Process Systems Engineering, 
%               Otto-von-Guericke-University Magdeburg
% Head:         Prof. Kai Sundmacher
%
% Nov 2016;     Last revision: 30-Jan-2018

function plot_dose_results(out,uip,p)
%% ===== calculate dose ===
dose_bottom = out.plot_count_bottom*100/(uip.N);
dose_wall = out.plot_count_rand*100/(uip.N);
dose_total = (out.plot_count_rand + out.plot_count_bottom)*100/(uip.N);

%% ===== plot dose over time =====
figure(1)
plot([0 out.plot_time],[0 dose_bottom],'go',[0 out.plot_time],[0 dose_wall], 'rx',[0 out.plot_time],[0 dose_total], 'k.')
xlabel('time [h]')
ylabel('dose [%]')
legend('bottom','wall','total')

% ===== plot 3D distribution =====
A = out.A;
B = out.B;

area_bottom = p.A;
area_wall = 2*pi*p.radius*p.wuchshoehe;

balken= [30 30];

[Bodenx Bodeny] = pol2cart(B(:,1), B(:,2));
Boden = [Bodenx Bodeny]*10^(-7);

figure(2)
colormap('parula')
hist3(Boden,balken,'FaceAlpha',.85); 
xlabel('X [cm]'); ylabel('Y [cm]'); 
surfHandle = get(gca, 'child');
set(surfHandle,'FaceColor','interp', 'CdataMode', 'auto');
title('particle distribution bottom')
zlabels = get(gca,'ZTickLabel');
zmat = cellfun(@str2num,zlabels);
dose_per_area_num = zmat*100/(uip.N);
dose_per_area_str = num2str(dose_per_area_num);
set(gca,'ZTickLabel',dose_per_area_str);
zlabel('dose per unit [%]')


A(:,3) = A(:,3)*10^(-7);
A(:,1) = A(:,1) + ones(numel(A(:,1),1))*pi;

figure(6)
colormap('parula')
hist3([A(:,1) A(:,3)],[50 50],'FaceAlpha',.85); 
xlabel('\phi [rad]'); ylabel('height [cm]'); zlabel('dose [%] per unit')
surfHandle = get(gca, 'child');
set(surfHandle,'FaceColor','interp', 'CdataMode', 'auto');
title('particle distribution wall')
zlabels = get(gca,'ZTickLabel');
zmat = cellfun(@str2num,zlabels);
dose_per_area_num = zmat*100/(uip.N);
dose_per_area_str = num2str(dose_per_area_num);
set(gca,'ZTickLabel',dose_per_area_str);
end
